# Supplementary material
Source: Springer Nature journal article supplement (https://www.springermedizin.de/resource/supplementary/12911_2010_368_MOESM1_ESM.pdf/9525586)

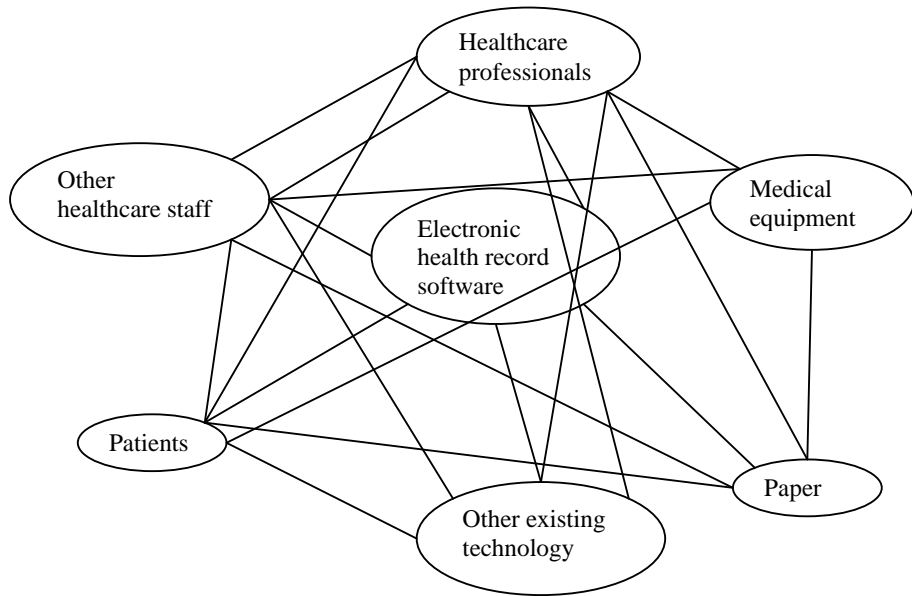

Supplement: MOESM1 [file 9525586]
